# Supplementary material for: Identification of two CiGADs from Caragana intermedia and their transcriptional responses to abiotic stresses and exogenous abscisic acid
Source: PubMed Central journal article supplement (PMC5473354; doi:10.7717/peerj.3439), 2017-06-14
Supplement: peerj-05-3439-s003.pdf [file peerj-05-3439-s003.pdf]

|             | Primer name      | Primer sequences           |
|-------------|------------------|----------------------------|
| 5'- RACE    | <i>CiGAD1-1</i>  | AGTGCCDGC DTACDCCDTGC      |
|             | <i>CiGAD1-2</i>  | CGGAGCTGACCDACCCDCCTTTACCC |
| 3'- RACE    | <i>CiGAD1-3</i>  | ACDAACDCCDCTCDTCTTATC      |
|             | <i>CiGAD1-4</i>  | CCDCCDAAGCGCCTCDAAAAATCDG  |
| 5'- RACE    | <i>CiGAD2-1</i>  | ATGCDCDACDCDTCDCTGTTC      |
|             | <i>CiGAD2-2</i>  | GGGGCTAATGTGCDGGTTTGTGGGA  |
| 3'- RACE    | <i>CiGAD2-3</i>  | GCDTGTTCDDACTCTCTTG        |
|             | <i>CiGAD2-4</i>  | GCCDAGCCGCDACTGAAATCCTCCCT |
| Full-length | <i>CiGAD1-5F</i> | GATGGTTCTCTCCAAGGCCGCCTC   |
|             | <i>CiGAD1-5R</i> | CTAACAAACACCACTCATCTTA CC  |
|             | <i>CiGAD2-5F</i> | G ATGGTTCTCTCCAAGGCCGCCT   |
|             | <i>CiGAD2-5R</i> | AACAAACACCACTCTCATCTTA     |
