# Supplementary material for: Identification of two CiGADs from Caragana intermedia and their transcriptional responses to abiotic stresses and exogenous abscisic acid
Source: PubMed Central journal article supplement (PMC5473354; doi:10.7717/peerj.3439), 2017-06-14
Supplement: peerj-05-3439-s004.pdf [file peerj-05-3439-s004.pdf]

---

| Gene name                     | Primer name  | Primer sequences       |
|-------------------------------|--------------|------------------------|
| <i>EF1<math>\alpha</math></i> | <i>Act-F</i> | TGGGTGGGACATTCTCTGATT  |
|                               | <i>Act-R</i> | GCACGGTTCACTTCTTCTTAGC |
| <i>CiGAD1</i>                 | <i>1F-1</i>  | CCATGCCTCCAGATGCTCAA   |
|                               | <i>1R-1</i>  | ACTTCTTCCAAACCGCAGTGA  |
|                               | <i>1F-2</i>  | ACCGCAGTGATTTCCCTTTGA  |
|                               | <i>1R-2</i>  | TACACCATGCCTCCAGATGC   |
| <i>CiGAD2</i>                 | <i>2F-1</i>  | ACAAGTCTCTCAGCCAAGCC   |
|                               | <i>2R-1</i>  | GGAGTGCCACTTGTAGCCTT   |
|                               | <i>2F-2</i>  | CTCCTCCAGACAACCCAACC   |
|                               | <i>2R-2</i>  | TGTAGATGCTGCAAGTGGGG   |

---
